# Supplementary material
Source: PubMed Central journal article supplement (PMC10560941)
Supplement: ajcr0013-4305-f5.pdf [file ajcr0013-4305-f5.pdf]

Hematological and radiation parameters are related to prognosis

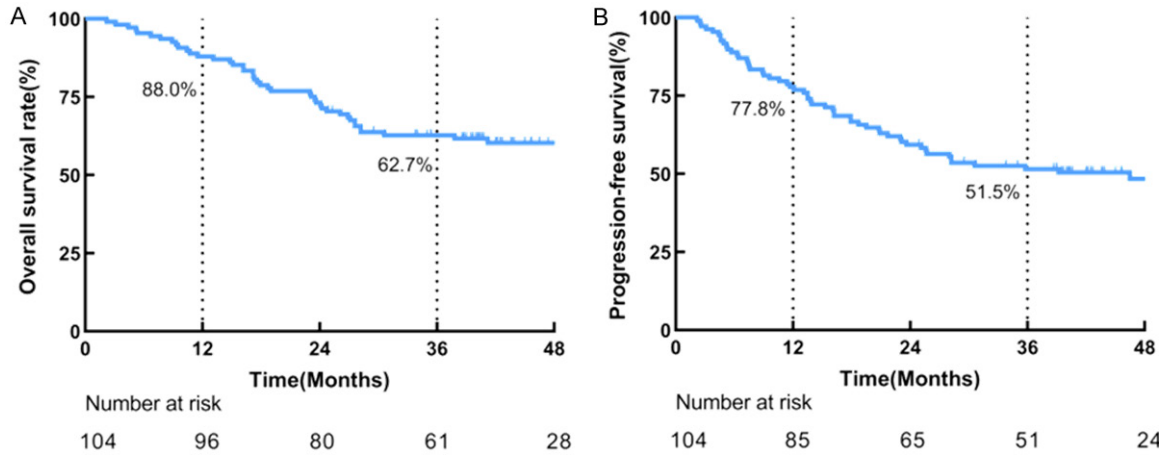

**Supplementary Figure 1.** Kaplan-Meier curves of survival for the entire study cohort (A) overall survival, (B) progression-free survival.

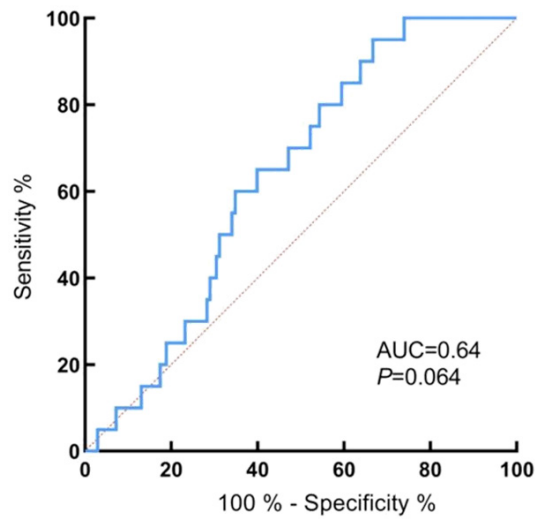

**Supplementary Figure 2.** ROC curve analysis of the ability of RIL cutoff to predict grade 2 and above radiation pneumonitis.
